# Supplementary material
Source: PubMed Central journal article supplement (PMC6892632)
Supplement: NIHMS1059592-supplement-Supporting_Materials.pdf [file NIHMS1059592-supplement-Supporting_Materials.pdf]

## Supporting Information

### Decorin Regulates the Aggrecan Network Integrity and Biomechanical Functions of Cartilage Extracellular Matrix

*Biao Han<sup>1</sup>, Qing Li<sup>1</sup>, Chao Wang<sup>1</sup>, Pavan Patel<sup>1</sup>, Sheila M. Adams<sup>2</sup>,  
Basak Doyran<sup>1</sup>, Hadi T. Nia<sup>3</sup>, Ramin Oftadeh<sup>4</sup>, Siyuan Zhou<sup>5</sup>, Christopher Y. Li<sup>6</sup>,  
X. Sherry Liu<sup>7</sup>, X. Lucas Lu<sup>8</sup>, Motomi Enomoto-Iwamoto<sup>9</sup>,  
Ling Qin<sup>7</sup>, Robert L. Mauck<sup>7</sup>, Renato V. Iozzo<sup>10</sup>, David Birk<sup>2</sup>, Lin Han<sup>1,\*</sup>*

<sup>1</sup>School of Biomedical Engineering, Science and Health Systems, Drexel University,  
Philadelphia, Pennsylvania 19104, United States

<sup>2</sup>Department of Molecular Pharmacology and Physiology, Morsani School of Medicine,  
University of South Florida, Tampa, Florida 33612, United States

<sup>3</sup>Department of Biomedical Engineering, Boston University, Boston, MA 02215, United States

<sup>4</sup>Department of Mechanical Engineering, Massachusetts Institute of Technology,  
Cambridge, Massachusetts 02139, United States

<sup>5</sup>College of Food Science, Southwest University, Chongqing, 400715, China

<sup>6</sup>Department of Materials Science and Engineering, Drexel University,  
Philadelphia, Pennsylvania 19104, United States

<sup>7</sup>McKay Orthopaedic Research Laboratory, Department of Orthopaedic Surgery, Perelman School of  
Medicine, University of Pennsylvania, Philadelphia, Pennsylvania 19104, United States

<sup>8</sup>Department of Mechanical Engineering, University of Delaware, Newark,  
Delaware 19716, United States

<sup>9</sup>Department of Orthopaedics, School of Medicine, University of Maryland,  
Baltimore, Maryland 21201, United States

<sup>10</sup>Department of Pathology, Anatomy, and Cell Biology, Sidney Kimmel Medical College,  
Thomas Jefferson University, Philadelphia, Pennsylvania 19107, United States

\*Correspondence and requests for materials should be addressed to:

Dr. Lin Han

Phone: (215)571-3821

Fax: (215)895-4983

Email: [lh535@drexel.edu](mailto:lh535@drexel.edu).

**Table S1.** List of primers used for quantitative RT-PCR (qPCR)

| Gene                            | Forward Primer                 | Reverse Primer                 |
|---------------------------------|--------------------------------|--------------------------------|
| <i>Dcn</i>                      | 5'-TGAGCTTCAACAGCATCACC-3'     | 5'-AAGTCATTTGCCCAACTGC-3'      |
| <i>Acan</i>                     | 5'-GACTGTGTGGTGATGATCTG-3'     | 5'-CTCGTAGCGATCTTTCTTCTG-3'    |
| <i>Col1a1</i>                   | 5'-TTCTCCTGGCAAAGACGGACTCAA-3' | 5'-AGGAAGCTGAAGTCATAACCGCCA-3' |
| <i>Col2a1</i>                   | 5'-GCTGGTGCACAAGGTCCTAT-3'     | 5'-ACCCTGCAGTCCAGTGAAC-3'      |
| <i>Has2</i>                     | 5'-ACAGGCACCTTACCAACAGGGTGT-3' | 5'-GCATGCATAGATCAAAGTCCCACG-3' |
| <i>Hapln1</i>                   | 5'-AAATGGGAATGGGTGGGTAG-3'     | 5'-TGGAGGGGAAATGAGGAAAG-3'     |
| <i><math>\beta</math>-actin</i> | 5'-AGATGACCCAGATCATGTTTGAGA-3' | 5'-CACAGCCTGGATGGCTACGT-3'     |
| <i>Gapdh</i>                    | 5'-TCAACAGCAACTCCCCTCTTCCA-3'  | 5'-ACCCTGTTGCTGTAGCCGTATTCA-3' |

**Table S2.** Summary of biological, biochemical and structural assay outcomes of native joints as averaged by each animal

|                                     | mean $\pm$ 95% CI                | <i>n</i> | mean $\pm$ 95% CI                | <i>n</i> | Unit                    | <i>p</i> -value | <i>H</i> |
|-------------------------------------|----------------------------------|----------|----------------------------------|----------|-------------------------|-----------------|----------|
|                                     | WT                               |          | <i>Dcn</i> <sup>-/-</sup>        |          |                         |                 |          |
| sGAGs                               | 6.3 $\pm$ 1.5                    | 6        | 2.2 $\pm$ 0.6                    | 6        | %                       | <0.001          | 1        |
| sGAGs ( <i>iKO</i> )                | 5.5 $\pm$ 0.5                    | 6        | 3.1 $\pm$ 0.5                    | 6        | %                       | 0.002           | 1        |
| collagen                            | 21.2 $\pm$ 5.4                   | 6        | 17.8 $\pm$ 5.8                   | 6        | %                       | 0.240           | 0        |
| aggrecan western                    | 1.00 $\pm$ 0.00                  | 6        | 0.61 $\pm$ 0.17                  | 6        | a.u.                    | 0.002           | 1        |
| <i>t</i> <sub>uncalcified</sub>     | 48 $\pm$ 8                       | 6        | 51 $\pm$ 6                       | 6        | $\mu$ m                 | 0.394           | 0        |
| <i>t</i> <sub>total</sub>           | 123 $\pm$ 10                     | 6        | 130 $\pm$ 9                      | 6        | $\mu$ m                 | 0.132           | 0        |
| $\rho$ <sub>cell, uncalcified</sub> | (3.5 $\pm$ 0.3) $\times 10^{-3}$ | 6        | (3.5 $\pm$ 0.6) $\times 10^{-3}$ | 6        | #/ $\mu$ m <sup>2</sup> | 0.818           | 0        |
| $\rho$ <sub>cell, calcified</sub>   | (1.8 $\pm$ 0.2) $\times 10^{-3}$ | 6        | (1.8 $\pm$ 0.4) $\times 10^{-3}$ | 6        | #/ $\mu$ m <sup>2</sup> | 0.699           | 0        |
| SBP <i>t</i> <sub>medial</sub>      | 114 $\pm$ 37                     | 5        | 110 $\pm$ 34                     | 5        | $\mu$ m                 | 1.000           | 0        |
| SBP <i>t</i> <sub>lateral</sub>     | 112 $\pm$ 41                     | 5        | 108 $\pm$ 15                     | 5        | $\mu$ m                 | 0.841           | 0        |
| STB BV/TV <sub>medial</sub>         | 59 $\pm$ 13                      | 5        | 56 $\pm$ 11                      | 5        | %                       | 1.000           | 0        |
| STB BV/TV <sub>lateral</sub>        | 43 $\pm$ 13                      | 5        | 33 $\pm$ 17                      | 5        | %                       | 0.095           | 0        |
| STB Tb. N <sub>medial</sub>         | 7.4 $\pm$ 0.9                    | 5        | 7.0 $\pm$ 1.4                    | 5        | --                      | 0.548           | 0        |
| STB Tb. N <sub>lateral</sub>        | 6.8 $\pm$ 1.2                    | 5        | 6.7 $\pm$ 0.7                    | 5        | --                      | 1.000           | 0        |
| STB Tb. Th <sub>medial</sub>        | 84 $\pm$ 26                      | 5        | 69 $\pm$ 25                      | 5        | $\mu$ m                 | 0.548           | 0        |
| STB Tb. Th <sub>lateral</sub>       | 74 $\pm$ 15                      | 5        | 54 $\pm$ 3                       | 5        | $\mu$ m                 | 0.008           | 1        |
| Men. OV <sub>ant., medial</sub>     | 0.099 $\pm$ 0.056                | 5        | 0.105 $\pm$ 0.022                | 5        | mm <sup>3</sup>         | 1.000           | 0        |
| Men. OV <sub>ant., lateral</sub>    | 0.098 $\pm$ 0.049                | 5        | 0.106 $\pm$ 0.024                | 5        | mm <sup>3</sup>         | 0.690           | 0        |
| Men. OV <sub>pos., medial</sub>     | 0.017 $\pm$ 0.012                | 5        | 0.013 $\pm$ 0.006                | 5        | mm <sup>3</sup>         | 0.420           | 0        |
| Men. OV <sub>pos., lateral</sub>    | 0.014 $\pm$ 0.006                | 5        | 0.016 $\pm$ 0.009                | 5        | mm <sup>3</sup>         | 1.000           | 0        |

**Table S3.** Summary of cartilage and meniscus biomechanical properties as averaged by each animal

|                                               | mean $\pm$ 95% CI                 | <i>n</i> | mean $\pm$ 95% CI                           | <i>n</i> | Unit                  | <i>p</i> -value | <i>H</i> |
|-----------------------------------------------|-----------------------------------|----------|---------------------------------------------|----------|-----------------------|-----------------|----------|
|                                               | WT                                |          | <i>Dcn</i> <sup>-/-</sup>                   |          |                       |                 |          |
| <i>E</i> <sub>ind</sub> (3-day)               | 0.22 $\pm$ 0.08                   | 5        | 0.19 $\pm$ 0.05                             | 5        | MPa                   | 0.310           | 0        |
| <i>E</i> <sub>ind</sub> (1-week)              | 0.29 $\pm$ 0.11                   | 5        | 0.32 $\pm$ 0.19                             | 5        | MPa                   | 1.000           | 0        |
| <i>E</i> <sub>ind</sub> (2-week)              | 0.60 $\pm$ 0.06                   | 11       | 0.39 $\pm$ 0.05                             | 11       | MPa                   | < 0.001         | 1        |
| <i>E</i> <sub>ind</sub> (1-month)             | 1.23 $\pm$ 0.18                   | 5        | 0.57 $\pm$ 0.25                             | 5        | MPa                   | 0.008           | 1        |
| <i>E</i> <sub>ind</sub> (3-month)             | 1.45 $\pm$ 0.21                   | 12       | 0.46 $\pm$ 0.06                             | 12       | MPa                   | < 0.001         | 1        |
| <i>E</i> <sub>ind</sub> (meniscus)            | 5.27 $\pm$ 0.52                   | 12       | 4.76 $\pm$ 1.29                             | 8        | MPa                   | 0.335           | 0        |
| <i>E</i> <sub>H</sub> / <i>E</i> <sub>L</sub> | 7.0 $\pm$ 1.7                     | 8        | 4.1 $\pm$ 0.7                               | 8        | --                    | 0.002           | 1        |
| $\delta_m$                                    | 25.4 $\pm$ 3.6                    | 8        | 11.3 $\pm$ 3.0                              | 8        | degree                | < 0.001         | 1        |
| <i>k</i>                                      | (6.1 $\pm$ 1.2) $\times 10^{-16}$ | 8        | (5.7 $\pm$ 2.5) $\times 10^{-15}$           | 8        | m <sup>4</sup> /(N·s) | < 0.001         | 1        |
| <i>E</i> <sub>L</sub>                         | 1.33 $\pm$ 0.49                   | 8        | 0.48 $\pm$ 0.20                             | 8        | MPa                   | 0.002           | 1        |
| <i>E</i> <sub>H</sub>                         | 8.21 $\pm$ 2.55                   | 8        | 1.52 $\pm$ 0.44                             | 8        | MPa                   | < 0.001         | 1        |
| <i>E</i> <sub>m</sub>                         | 0.60 $\pm$ 0.27                   | 8        | 0.25 $\pm$ 0.13                             | 8        | MPa                   | 0.015           | 1        |
| <i>E</i> <sub>f</sub>                         | 2.15 $\pm$ 0.33                   | 8        | 0.27 $\pm$ 0.10                             | 8        | MPa                   | < 0.001         | 1        |
|                                               | WT (CS-GAG-depleted)              |          | <i>Dcn</i> <sup>-/-</sup> (CS-GAG-depleted) |          |                       |                 |          |
| <i>E</i> <sub>H</sub> / <i>E</i> <sub>L</sub> | 2.2 $\pm$ 1.0                     | 6        | 2.1 $\pm$ 0.4                               | 6        | --                    | 0.937           | 0        |
| $\delta_m$                                    | 6.6 $\pm$ 4.0                     | 6        | 2.2 $\pm$ 0.6                               | 6        | degree                | 0.065           | 0        |
| <i>k</i>                                      | (1.2 $\pm$ 0.6) $\times 10^{-14}$ | 6        | (1.2 $\pm$ 0.8) $\times 10^{-14}$           | 6        | m <sup>4</sup> /(N·s) | 0.818           | 0        |
| <i>E</i> <sub>L</sub>                         | 0.50 $\pm$ 0.21                   | 6        | 0.47 $\pm$ 0.21                             | 6        | MPa                   | 0.937           | 0        |
| <i>E</i> <sub>H</sub>                         | 0.89 $\pm$ 0.18                   | 6        | 0.98 $\pm$ 0.39                             | 6        | MPa                   | 0.589           | 0        |
| <i>E</i> <sub>m</sub>                         | 0.14 $\pm$ 0.05                   | 6        | 0.20 $\pm$ 0.05                             | 6        | MPa                   | 0.065           | 0        |
| <i>E</i> <sub>f</sub>                         | 0.21 $\pm$ 0.03                   | 6        | 0.25 $\pm$ 0.03                             | 6        | MPa                   | 0.015           | 1        |
|                                               | Control                           |          | <i>Dcn</i> <sup>iKO</sup>                   |          |                       |                 |          |
| <i>E</i> <sub>H</sub> / <i>E</i> <sub>L</sub> | 8.9 $\pm$ 1.7                     | 6        | 4.7 $\pm$ 1.8                               | 6        | --                    | 0.009           | 1        |
| $\delta_m$                                    | 29.3 $\pm$ 2.1                    | 6        | 13.7 $\pm$ 2.2                              | 6        | degree                | 0.002           | 1        |
| <i>k</i>                                      | (7.6 $\pm$ 1.5) $\times 10^{-16}$ | 6        | (7.4 $\pm$ 1.0) $\times 10^{-15}$           | 6        | m <sup>4</sup> /(N·s) | 0.002           | 1        |
| <i>E</i> <sub>L</sub>                         | 1.40 $\pm$ 0.27                   | 6        | 0.56 $\pm$ 0.31                             | 6        | MPa                   | 0.002           | 1        |
| <i>E</i> <sub>H</sub>                         | 12.45 $\pm$ 3.09                  | 6        | 2.61 $\pm$ 1.97                             | 6        | MPa                   | 0.002           | 1        |
| <i>E</i> <sub>m</sub>                         | 0.98 $\pm$ 0.20                   | 6        | 0.42 $\pm$ 0.26                             | 6        | MPa                   | 0.002           | 1        |
| <i>E</i> <sub>f</sub>                         | 1.25 $\pm$ 0.48                   | 6        | 0.73 $\pm$ 0.25                             | 6        | MPa                   | 0.022           | 1        |

**Table S4.** Summary of qPCR and DMMB analyses outcomes from *in vitro* chondrocyte culture

|               | mean ± 95% CI   | <i>n</i> | mean ± 95% CI                          | <i>n</i> | Unit                                | <i>p</i> -value | <i>H</i> |
|---------------|-----------------|----------|----------------------------------------|----------|-------------------------------------|-----------------|----------|
|               | WT (no TGF-β)   |          | <i>Dcn</i> <sup>-/-</sup> (no TGF-β)   |          |                                     |                 |          |
| <i>Dcn</i>    | 1.00 ± 0.36     | 7        | 0.04 ± 0.02                            | 7        | relative mRNA (to WT without TGF-β) | < 0.001         | 1        |
| <i>Acan</i>   | 1.00 ± 0.42     | 7        | 1.02 ± 0.54                            | 7        |                                     | 1.000           | 0        |
| <i>Has2</i>   | 1.00 ± 0.48     | 7        | 1.06 ± 0.53                            | 7        |                                     | 0.805           | 0        |
| <i>Hapln1</i> | 1.00 ± 0.93     | 7        | 1.18 ± 0.31                            | 7        |                                     | 0.318           | 0        |
| <i>Col2a1</i> | 1.00 ± 0.41     | 7        | 1.04 ± 0.40                            | 7        |                                     | 0.805           | 0        |
| <i>Colla1</i> | 1.00 ± 0.62     | 7        | 1.17 ± 0.46                            | 7        |                                     | 0.710           | 0        |
| media (2-day) | 6.4 ± 1.7       | 13       | 5.4 ± 1.8                              | 13       | sGAGs (μg/10 <sup>6</sup> cells)    | 0.305           | 0        |
| media (4-day) | 12.2 ± 2.1      | 13       | 11.9 ± 2.8                             | 13       |                                     | 0.720           | 0        |
| media (6-day) | 17.6 ± 2.9      | 13       | 23.9 ± 4.3                             | 13       |                                     | 0.035           | 1        |
| media (8-day) | 24.9 ± 4.4      | 13       | 36.4 ± 4.8                             | 13       |                                     | 0.004           | 1        |
| matrix        | 37.3 ± 4.0      | 13       | 23.2 ± 1.9                             | 13       |                                     | < 0.001         | 1        |
| total         | 62.3 ± 5.6      | 13       | 59.6 ± 5.0                             | 13       |                                     | 0.412           | 0        |
|               | WT (with TGF-β) |          | <i>Dcn</i> <sup>-/-</sup> (with TGF-β) |          |                                     |                 |          |
| <i>Dcn</i>    | 2.54 ± 1.00     | 7        | 0.05 ± 0.01                            | 7        | relative mRNA (to WT without TGF-β) | < 0.001         | 1        |
| <i>Acan</i>   | 1.68 ± 0.49     | 7        | 1.78 ± 0.58                            | 7        |                                     | 0.805           | 0        |
| <i>Has2</i>   | 2.01 ± 0.54     | 7        | 2.01 ± 0.67                            | 7        |                                     | 1.000           | 0        |
| <i>Hapln1</i> | 1.83 ± 1.04     | 7        | 1.87 ± 0.56                            | 7        |                                     | 1.000           | 0        |
| <i>Col2a1</i> | 2.14 ± 0.49     | 7        | 1.98 ± 0.38                            | 7        |                                     | 0.804           | 0        |
| <i>Colla1</i> | 1.34 ± 0.56     | 7        | 1.16 ± 0.53                            | 7        |                                     | 0.318           | 0        |
| media (2-day) | 10.4 ± 4.3      | 7        | 16.0 ± 4.3                             | 7        | sGAGs (μg/10 <sup>6</sup> cells)    | 0.072           | 0        |
| media (4-day) | 18.6 ± 6.3      | 7        | 27.3 ± 7.4                             | 7        |                                     | 0.053           | 0        |
| media (6-day) | 25.8 ± 6.2      | 7        | 40.0 ± 7.1                             | 7        |                                     | 0.004           | 1        |
| media (8-day) | 38.5 ± 7.1      | 7        | 55.4 ± 5.9                             | 7        |                                     | 0.002           | 1        |
| matrix        | 49.6 ± 9.1      | 7        | 28.2 ± 2.2                             | 7        |                                     | 0.004           | 1        |
| total         | 88.1 ± 11.6     | 7        | 83.7 ± 7.1                             | 7        |                                     | 0.710           | 0        |

**Table S5.** Summary of the distributions of collagen fibril nanostructure analyses

| Region                     | Geno-<br>type             | <i>n</i> | Collagen fibril diameter $d_{col}$ (nm) |       |       |                      |                 |          | Variance $s^2$ of $d_{col}$ (nm <sup>2</sup> ) |                 |                 |          |
|----------------------------|---------------------------|----------|-----------------------------------------|-------|-------|----------------------|-----------------|----------|------------------------------------------------|-----------------|-----------------|----------|
|                            |                           |          | $Q_1$                                   | $Q_2$ | $Q_3$ | mean<br>$\pm$ 95% CI | <i>p</i> -value | <i>H</i> | $s^2$                                          | 95% CI of $s^2$ | <i>p</i> -value | <i>H</i> |
| Superficial<br>Layer       | WT                        | 868      | 28                                      | 32    | 37    | 33.2 $\pm$ 0.5       | 0.297           | 0        | 58.7                                           | [53.6 64.7]     | < 0.001         | 1        |
|                            | <i>Dcn</i> <sup>-/-</sup> | 928      | 27                                      | 33    | 39    | 33.6 $\pm$ 0.6       |                 |          | 97.5                                           | [89.2 107.1]    |                 |          |
| Territorial<br>Matrix      | WT                        | 213      | 52                                      | 60    | 67    | 59.7 $\pm$ 1.3       | 0.225           | 0        | 96.8                                           | [81.1 118.8]    | 0.015           | 1        |
|                            | <i>Dcn</i> <sup>-/-</sup> | 385      | 53                                      | 60    | 70    | 60.9 $\pm$ 1.1       |                 |          | 130.8                                          | [114.4 151.8]   |                 |          |
| Interterritorial<br>Matrix | WT                        | 218      | 58                                      | 66    | 75    | 67.5 $\pm$ 1.8       | 0.145           | 0        | 177.0                                          | [148.5 216.6]   | < 0.001         | 1        |
|                            | <i>Dcn</i> <sup>-/-</sup> | 253      | 57                                      | 68    | 82    | 69.7 $\pm$ 2.3       |                 |          | 344.1                                          | [292.3 414.7]   |                 |          |
| Meniscus                   | WT                        | 1,267    | 41                                      | 67    | 85    | 64.0 $\pm$ 1.4       | 0.783           | 0        | 628.6                                          | [582.4 680.6]   | 0.250           | 0        |
|                            | <i>Dcn</i> <sup>-/-</sup> | 1,183    | 45                                      | 67    | 83    | 64.3 $\pm$ 1.4       |                 |          | 588.6                                          | [543.9 639.0]   |                 |          |

**Table S6.** Summary of the distributions of molecular adhesion analyses

|                                                  |                   | With decorin protein |       |       |       |                      | Without decorin protein |       |       |       |                      | <i>p</i> -value | <i>H</i> |
|--------------------------------------------------|-------------------|----------------------|-------|-------|-------|----------------------|-------------------------|-------|-------|-------|----------------------|-----------------|----------|
|                                                  |                   | <i>n</i>             | $Q_1$ | $Q_2$ | $Q_3$ | mean<br>$\pm$ 95% CI | <i>n</i>                | $Q_1$ | $Q_2$ | $Q_3$ | mean<br>$\pm$ 95% CI |                 |          |
| aggrecan<br><i>versus</i><br>aggrecan            | $F_{adh}$<br>(nN) | 213                  | 1.22  | 1.44  | 1.76  | 1.53 $\pm$ 0.06      | 201                     | 0.89  | 1.09  | 1.32  | 1.13 $\pm$ 0.05      | < 0.001         | 1        |
|                                                  | $E_{adh}$<br>(fJ) | 213                  | 0.77  | 0.88  | 0.97  | 0.87 $\pm$ 0.03      | 201                     | 0.43  | 0.48  | 0.54  | 0.50 $\pm$ 0.02      | < 0.001         | 1        |
| aggrecan<br><i>versus</i><br>collagen<br>fibrils | $F_{adh}$<br>(nN) | 270                  | 1.30  | 2.51  | 4.14  | 2.92 $\pm$ 0.22      | 181                     | 0.60  | 1.15  | 1.63  | 1.23 $\pm$ 0.12      | < 0.001         | 1        |
|                                                  | $E_{adh}$<br>(fJ) | 270                  | 0.52  | 1.38  | 3.11  | 2.23 $\pm$ 0.27      | 181                     | 0.36  | 0.91  | 1.38  | 0.93 $\pm$ 0.09      | < 0.001         | 1        |

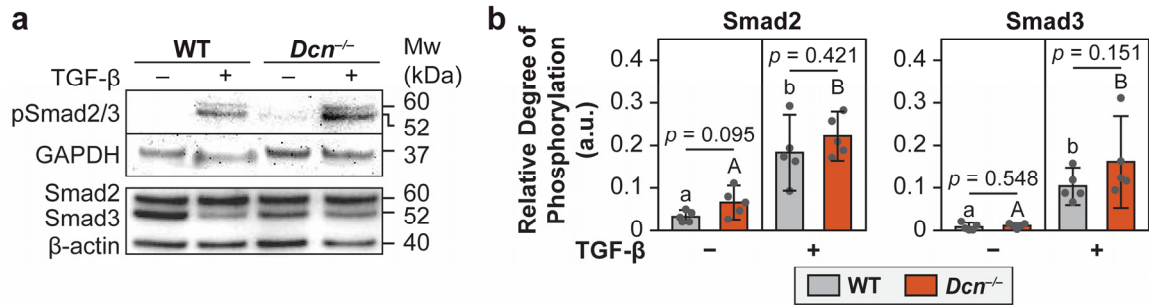

**Figure S1.** a) Representative western blot shows the phosphorylation of Smad2/3 under the stimulus of 10 ng/mL TGF- $\beta$ 1 for primary chondrocytes cultured in alginate beads in chondrogenic DMEM for 8 days, evidencing the activation of canonical TGF- $\beta$  signaling in both WT and *Dcn*<sup>-/-</sup> chondrocytes. b) Semi-quantitative analysis shows that between WT and *Dcn*<sup>-/-</sup> chondrocytes shows no significant differences in the relative degree of the phosphorylation of Smad2 and Smad3 (mean  $\pm$  95% CI,  $n = 5$  biological repeats for each group *via* Mann-Whitney U test). Different letters indicate significant differences between the untreated and TGF- $\beta$ 1 treated groups within each genotype *via* Mann-Whitney U test ( $p < 0.01$ ). Each data point represents the value of one biological repeat of cells pooled from five 1-month-old mice of the same genotype.

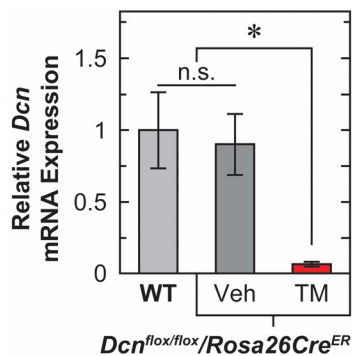

**Figure S2.** Confirmation of the induced knockout of *Dcn* gene in *Dcn*<sup>IKO</sup> mice *via* tamoxifen administration. In 1-month-old *Dcn*<sup>flox/flox</sup>/*Rosa26Cre*<sup>ER</sup> mice, intraperitoneal (i.p.) injection of 3 mg tamoxifen (TM)/40 g body weight for 3 consecutive days reduces the expression of decorin (*Dcn*) to the baseline level (mean  $\pm$  SEM,  $n = 5$  animals, \*:  $p < 0.05$  *via* Kruskal-Wallis tested followed by Tukey-Kramer post-hoc multiple comparison), as tested on day 5, while injection of vehicle (Veh) does not alter the level of *Dcn* expression in comparison to the wild-type (WT) ( $p = 0.933$ ).

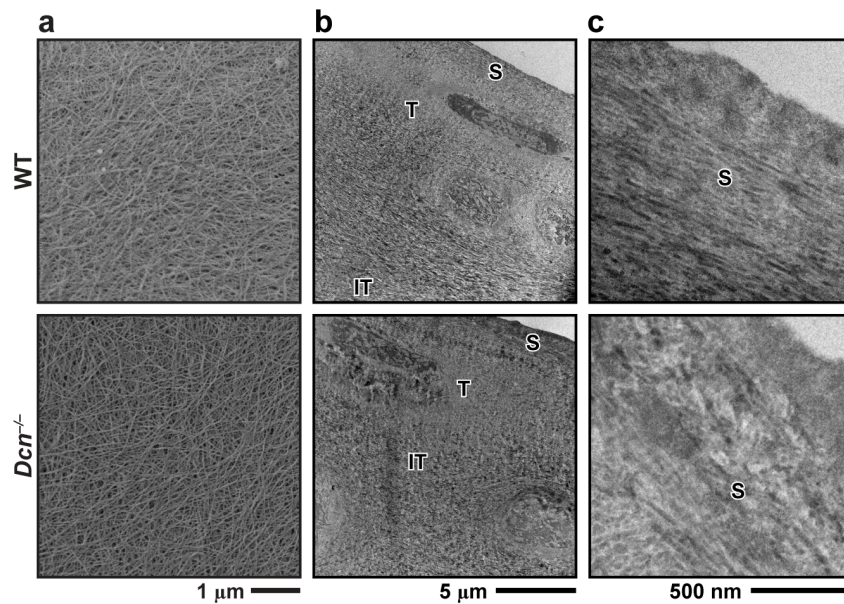

**Figure S3. Scanning electron microscope (SEM) and transmission electron microscope (TEM) images of murine knee cartilage.** a) Representative low resolution SEM images of cartilage surfaces from 3-month-old mice shows that cartilage surface is dominated by randomly aligned, transversely oriented collagen fibrils in both genotypes. b) Representative low resolution TEM images of cartilage sagittal sections illustrate the identification of superficial layer (S), as well as territorial (T) and interterritorial (IT) extracellular matrices of the middle/deep zone. c) Higher resolution images of the superficial layer show the presence of transversely oriented collagen fibrils in both genotypes. All the images were taken from 3-month-old WT and *Dcn*<sup>-/-</sup> mice.

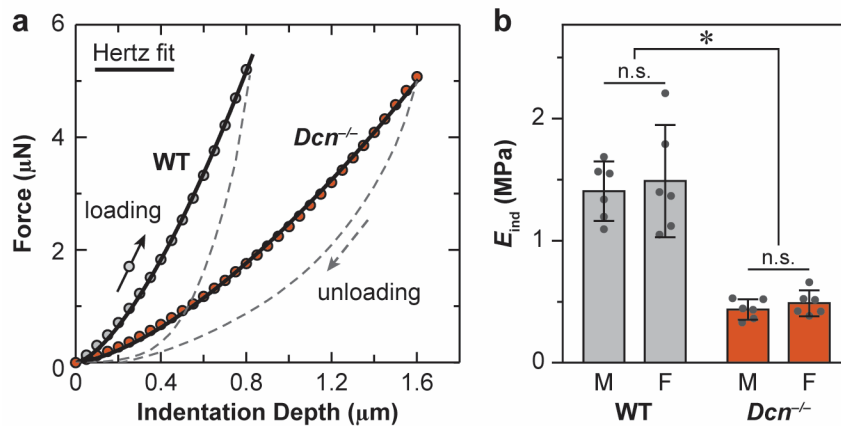

**Figure S4. AFM-nanoindentation.** a) Representative indentation force *versus* depth (*F-D*) curves measured on the condyle cartilage of 3-month-old WT and *Dcn*<sup>-/-</sup> mice, and corresponding Hertz model fit (solid line, tip radius  $R \approx 12.5 \mu\text{m}$ , nominal  $k \approx 5.4 \text{ N/m}$ ,  $R^2 > 0.99$ ). b) Comparison of indentation modulus,  $E_{\text{ind}}$ , between cartilage of 3-month-old female and male mice (\*:  $p < 0.001$  between WT and *Dcn*<sup>-/-</sup> cartilage *via* Kruskal-Wallis test followed by Tukey-Kramer post-hoc multiple comparison). No significant animal sex-associated differences were detected ( $p > 0.99$  between male (M) and female (F) mice for both genotypes).

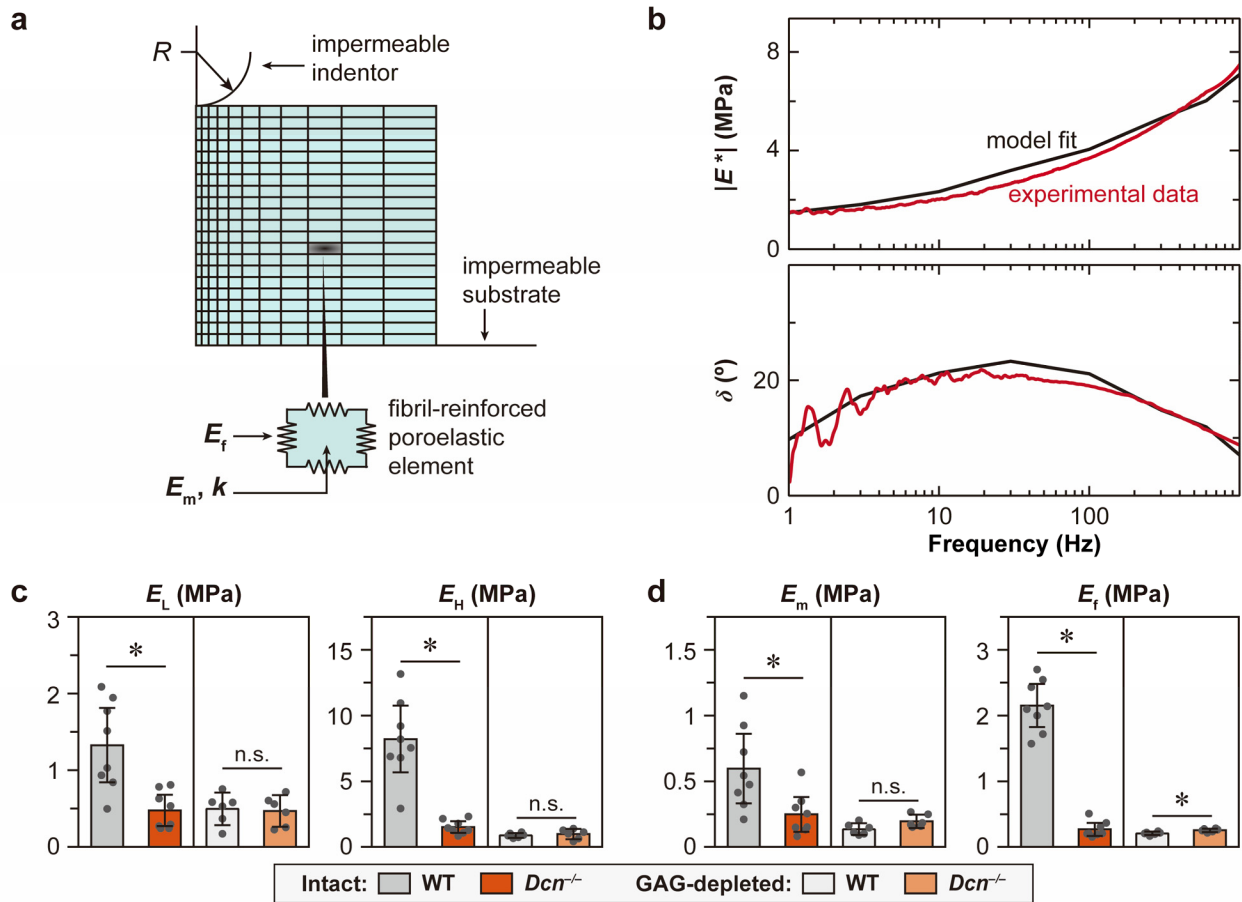

**Figure S5.** a) Schematics of the fibril-reinforced finite element model (FEM) for analyzing AFM-nanorheometric test outcomes. b) Representative model fit to the experimental data of dynamic modulus,  $|E^*|$ , and phase angle,  $\delta$ , shown for one outcome measured on intact WT medial condyle cartilage at 3-month age. c-d) Additional elastic and poroelastic mechanical properties of intact and CS-GAG-depleted cartilage for both WT and  $Dcn^{-/-}$  genotypes: c) averaged dynamic modulus at the low frequency end ( $\leq 5$  Hz),  $E_L$ , and the high frequency end (800-1,200 Hz),  $E_H$ , d) isotropic nonfibrillar matrix elastic modulus,  $E_m$ , and tensile-only Young's modulus,  $E_f$ , extracted via the fibril-reinforced FEM (mean  $\pm$  95% CI from  $n = 8$  animals for intact cartilage, and  $n = 6$  for GAG-depleted cartilage, \*:  $p < 0.05$  via Kruskal-Wallis test followed by Tukey-Kramer post-hoc multiple comparison). All the experiments were performed on 3-month-old medial condyle cartilage in  $1\times$  PBS with protease inhibitors using microspherical tips ( $R \approx 12.5 \mu\text{m}$ , nominal  $k \approx 16 \text{ N/m}$ ).
